# Supplementary material for: Home-based brain–computer interface attention training program for attention deficit hyperactivity disorder: a feasibility trial
Source: Springer Nature journal article supplement (doi:10.1186/s13034-022-00539-x), 2023-01-25
Supplement: MOESM1 [file 23953714]

**Additional file 1**

**Table S1.** Session spreads for each participant in both the clinic- and home-based groups

| Group        | Participant      | Number of sessions completed per week |        |        |        |        |        |        |        |        | Total |
|--------------|------------------|---------------------------------------|--------|--------|--------|--------|--------|--------|--------|--------|-------|
|              |                  | Week 1                                | Week 2 | Week 3 | Week 4 | Week 5 | Week 6 | Week 7 | Week 8 | Week 9 |       |
| Clinic-based | C1               | 2                                     | 3      | 2      | 3      | 3      | 4      | 3      | 3      | 1      | 24    |
|              | C2               | 3                                     | 3      | 3      | 3      | 1      | 3      | 3      | 3      | 2      | 24    |
|              | C3               | 1                                     | 3      | 1      | 2      | 1      | 3      | 3      | 3      | 3      | 20    |
|              | C4               | 1                                     | 3      | 3      | 3      | 3      | 2      | 3      | 3      | 3      | 24    |
|              | C5               | 3                                     | 3      | 3      | 3      | 3      | 3      | 3      | 2      | 1      | 24    |
|              | C6               | 3                                     | 3      | 3      | 3      | 3      | 3      | 3      | 3      |        | 24    |
|              | C7               | 2                                     | 3      | 3      | 2      | 3      | 3      | 3      | 3      | 2      | 24    |
|              | C8 <sup>a</sup>  | 1                                     | 3      | 5      | 5      | 2      | 3      | 2      | 2      | 1      | 24    |
|              | C9               | 3                                     | 1      | 3      | 3      | 3      | 3      | 3      | 2      | 3      | 24    |
|              | C10              | 1                                     | 2      | 3      | 3      | 3      | 3      | 2      | 3      | 4      | 24    |
| Home-based   | H1               | 2                                     | 1      | 3      | 2      | 3      | 3      | 2      | 5      | 3      | 24    |
|              | H2 <sup>a</sup>  | 3                                     | 5      | 5      | 2      | 3      | 3      | 2      | 1      |        | 24    |
|              | H3               | 3                                     | 3      | 3      | 2      | 4      | 3      | 1      | 4      | 1      | 24    |
|              | H4               | 2                                     | 3      | 3      | 1      | 3      | 3      | 4      | 3      | 2      | 24    |
|              | H5               | 3                                     | 3      | 3      | 3      | 3      | 3      | 3      | 3      |        | 24    |
|              | H6               | 2                                     | 4      | 5      | 3      | 3      | 3      | 3      | 1      |        | 24    |
|              | H7 <sup>a</sup>  | 3                                     | 3      | 2      | 1      | 4      | 2      | 3      | 4      | 2      | 24    |
|              | H8 <sup>a</sup>  | 3                                     | 2      | 2      | 4      | 3      | 2      | 5      | 3      |        | 24    |
|              | H9               | 3                                     | 3      | 3      | 2      | 3      | 3      | 1      | 3      | 3      | 24    |
|              | H10 <sup>a</sup> | 2                                     | 2      | 0      | 0      | 0      | 3      | 0      | 2      | 2      | 11    |

<sup>a</sup>Participants who did not have more than 3 weeks of completing a uniform spread of three sessions per week.
